# Supplementary material for: Personality and Interest in General Practice: Results from an Online Survey among Medical Students.
Source: Research Square preprint supplement (doi:10.21203/rs.3.rs-3156398/v1), 2023-10-09
Supplement: Supplementary file 1 [file 69f2e041441dc55237377036.docx]

Supplement 1: Results from analysis of covariance (ANCOVA) as presented in Figure 4.

| term | df | sumsq | meansq | statistic | p.value | signif |
| --- | --- | --- | --- | --- | --- | --- |
| V_dichotom | 1 | 12,0695851 | 12,0695851 | 6,83885007 | 0,00913837 | ** |
| F2.2_Geschlecht | 1 | 1,09700209 | 1,09700209 | 0,62158167 | 0,43076392 |  |
| V_dichotom:F2.2_Geschlecht | 1 | 0,56817817 | 0,56817817 | 0,32194026 | 0,570651 |  |
| Residuals | 615 | 1085,3864 | 1,76485593 |  |  |  |
| G_dichotom | 1 | 10,5670642 | 10,5670642 | 6,01748415 | 0,01444136 | * |
| F2.2_Geschlecht | 1 | 5,58399527 | 5,58399527 | 3,17984281 | 0,07504499 |  |
| G_dichotom:F2.2_Geschlecht | 1 | 2,99310425 | 2,99310425 | 1,70444289 | 0,19219614 |  |
| Residuals | 615 | 1079,977 | 1,75606016 |  |  |  |
| N_dichotom | 1 | 1,27863484 | 1,27863484 | 0,71840736 | 0,39699655 |  |
| F2.2_Geschlecht | 1 | 1,67069729 | 1,67069729 | 0,9386896 | 0,33299593 |  |
| N_dichotom:F2.2_Geschlecht | 1 | 1,58333328 | 1,58333328 | 0,88960369 | 0,34595509 |  |
| Residuals | 615 | 1094,5885 | 1,7798187 |  |  |  |
| O_dichotom | 1 | 0,02040934 | 0,02040934 | 0,0114699 | 0,91474648 |  |
| F2.2_Geschlecht | 1 | 2,35259886 | 2,35259886 | 1,32214285 | 0,25065477 |  |
| O_dichotom:F2.2_Geschlecht | 1 | 2,42744401 | 2,42744401 | 1,36420526 | 0,24326259 |  |
| Residuals | 615 | 1094,32071 | 1,77938327 |  |  |  |
| E_dichotom | 1 | 3,80429796 | 3,80429796 | 2,14054893 | 0,14396142 |  |
| F2.2_Geschlecht | 1 | 1,95015245 | 1,95015245 | 1,09728439 | 0,29527434 |  |
| E_dichotom:F2.2_Geschlecht | 1 | 0,35584587 | 0,35584587 | 0,20022236 | 0,65469899 |  |
| Residuals | 615 | 1093,01087 | 1,77725344 |  |  |  |
