# Supplementary material for: Personality and Interest in General Practice: Results from an Online Survey among Medical Students.
Source: Research Square preprint supplement (doi:10.21203/rs.3.rs-3156398/v1), 2023-10-09
Supplement: Supplementary file 2 [file b9267b25c4ffc027681d1829.docx]

**Supplement 1:**

**Personality assessment: translation and scaling of the BFI-K questionnaire**

**Instruction**

Translation: ‘Now we are interested in your attitudes. For each of the following statements, please indicate to what extent this statement applies to you in principle. In your answers, there are neither ‘right’ nor ‘wrong’, neither ‘good’ nor ‘bad’ answers. Please make your selection as spontaneously as possible. ’

Original wording in German: „Nun interessieren uns Ihre persönlichen Einstellungen. Bitte geben Sie bei den folgenden Aussagen jeweils an, inwieweit diese Aussage grundsätzlich auf Sie zutrifft. Bei Ihren Antworten gibt es weder „richtige“ noch „falsche“, weder „gute“ noch „schlechte“ Antworten. Bitte treffen Sie Ihre Auswahl möglichst spontan.“

**Translation of response format (scaling)**

Question: ‘To what extent do the following statements apply to you personally? I…’

Scaling to tick: very inapplicable - rather inapplicable - neither nor - rather applicable - very applicable

Original wording in German:

Frage: „Inwieweit treffen die folgenden Aussagen auf Sie persönlich zu? Ich…

Skalierung zum Ankreuzen: sehr unzutreffend - eher unzutreffend - weder noch - eher zutreffend – sehr zutreffend

**BFI-K questionnaire items**

| Number | Survey items in German  (equivalent to BFI-K, copyright by Beatrice Rammstedt & Oliver P. John). Ich… | Translation (following Oliver P. John & Christopher J. Soto, 2015).  I… | personality traits* |
| --- | --- | --- | --- |
| 1 | ... bin eher zurückhaltend. | ... am rather reserved. | E (reversed) |
| 2 | ... neige dazu, andere zu kritisieren. | … tend to criticize others. | A (reversed) |
| 3 | … erledige Aufgaben gründlich. | ... complete tasks thoroughly | C |
| 4 | … werde leicht deprimiert, niedergeschlagen. | … tend to feel depressed, blue | N |
| 5 | … bin vielseitig interessiert. | ... am interested in many things. | O |
| 6 | … bin begeisterungsfähig und kann andere leicht mitreißen. | … am enthusiastic and can easily enthuse others. | E |
| 7 | … schenke anderen leicht Vertrauen, glaube an das Gute im Menschen. | … trust others easily, assume the best about people. | A |
| 8 | … bin bequem, neige zur Faulheit. | …am comfortable, tend to be lazy. | C (reversed) |
| 9 | … bin entspannt, lasse mich durch Stress nicht aus der Ruhe bringen. | … am relaxed, handle stress well. | N (reversed) |
| 10 | .... bin tiefsinnig, denke gerne über Sachen nach. | .... am profound, a deep thinker. | O |
| 11 | … bin eher der „stille Typ“, wortkarg. | … am more the "quiet type", silent. | E (reversed) |
| 12 | … kann mich kalt und distanziert verhalten. | … can be cold and uncaring | A (reversed) |
| 13 | … bin tüchtig und arbeite flott. | … am efficient and work quickly. | C |
| 14 | … mache mir viele Sorgen. | … worry a lot | N |
| 15 | … habe eine aktive Vorstellungskraft, bin phantasievoll. | ... have an active imagination. | O |
| 16 | … gehe aus mir heraus, bin gesellig. | … am outgoing, sociable. | E |
| 17 | … kann mich schroff und abweisend anderen gegenüber verhalten. | .. can be rough and dismissive towards others. | A (reversed) |
| 18 | … mache Pläne und führe sie auch durch. | ... make plans and carry them out. | C |
| 19 | .... werde leicht nervös und unsicher. | … become nervous and insecure easily. | N |
| 20 | … schätze künstlerische und ästhetische Eindrücke. | … ... appreciate artistic and aesthetic impressions. | O |
| 21 | … habe nur wenig künstlerisches Interesse. | ... have little interest in arts. | O (reversed) |

*abbrevitations: E = Extraversion, N = Neuroticism, C = Conscientiousness, A = Agreeableness, O = Openness
